# Supplementary material for: Synthesis and anti-cancer evaluation of steroidal diglycoside–pyrazoline hybrids
Source: Royal Society of Chemistry journal article supplement (doi:10.1039/c4ra05599c), 2014-01-01
Supplement: c4ra05599c1.pdf [file c4ra05599c1.pdf]

## Electronic Supplementary information

### **Synthesis and anti-cancer evaluation of steroidal diglycoside-pyrazoline hybrids**

**Shravankumar Kankala,<sup>a,c</sup> Ranjith Kumar Kankala,<sup>b</sup> Devendar Reddy Kommidi,<sup>c</sup> Chandrashekar Mudithanapelli,<sup>a</sup> Ramesh Balaboina,<sup>a</sup> Ravinder Vadde<sup>\*a</sup> Sreekantha B. Jonnalagadda<sup>\*c</sup> and Chandra Sekhar Vasam<sup>\*d</sup>**

<sup>a</sup> Department of Chemistry, Kakatiya University, Warangal, India.

Fax: +91-870-2438800; Tel: +91-9390100594; E-mail: ravichemku@rediffmail.com

<sup>b</sup> Institute of Biotechnology, National Dong-Hwa University, Shou-Feng, Hualien 974, Taiwan, ROC.

<sup>c</sup> School of Chemistry & Physics, University of KwaZulu-Natal, Westville Campus, Chiltern Hills, Durban-4000, South Africa. Fax: +27 31 260 3091; Tel: +27 31 260 7325/3090; E-mail: jonnalagaddas@ukzn.ac.za

<sup>d</sup> Department of Chemistry, Satavahana University, Karimnagar, India.

Fax: +91-878-2255933; Tel: +91-9000285433; E-mail: vasamcs@yahoo.co.in

### Spectral data of Steroidal diglycosides 3b-k:

**Compound (3b).**  $^1\text{H}$  NMR (400 MHz,  $\text{CDCl}_3$ )  $\delta$  = 1.01 (s, 3H, Me-19), 1.04 (m, 1H, H-1 $\alpha$ ), 1.15 (m, 1H, H-5 $\alpha$ ), 1.20 (m, 1H, H-6 $\alpha$ ), 1.23 (d, 6H,  $J$  = 6.4 Hz, Me-6' & Me-6''), 1.30 (m, 1H, H-4 $\beta$ ), 1.32 (s, 3H, Me-18), 1.37 (m, 1H, H-9 $\alpha$ ), 1.41 (m, 1H, H-15 $\alpha$ ), 1.52 (m, 1H, H-2 $\beta$ ), 1.60 (m, 2H, H-2'a & H-2''a), 1.65 (m, 1H, H-4 $\alpha$ ), 1.68 (m, 1H, H-6 $\beta$ ), 1.75 (m, 1H, H-1 $\beta$ ), 1.78 (m, 1H, H-11 $\alpha$ ), 1.85 (m, 1H, H-2 $\alpha$ ), 1.88 (m, 1H, H-7 $\alpha$ ), 1.90 (m, 1H, H-15 $\beta$ ), 2.04 (m, 1H, H-11 $\beta$ ), 2.05 (m, 1H, H-16 $\alpha$ ), 2.08 (m, 1H, H-7 $\beta$ ), 2.10 (m, 2H, H-2'b & H-2''b), 2.16 (m, 1H, H-16 $\beta$ ), 2.38 (s, 3H, Me), 2.79 (m, 2H, H-21), 3.10 (q, 1H, H-17 $\alpha$ ), 3.20 (dd, 2H,  $J$  = 9.5, 3.0 Hz, H-4' & H-4''), 3.45 (s, 6H, OMe), 3.68 (m, 1H, H-3 $\alpha$ ), 3.84 (m, 2H, H-5' & H-5''), 3.88 (q, 2H, H-3' & H-3''), 4.81 (dd, 1H,  $J$  = 9.5, 2.0 Hz, H-1''), 4.88 (t, 1H, H-22), 4.91 (dd, 1H,  $J$  = 9.5, 2.0 Hz, H-1'), 4.95 (dd, 1H, H-12 $\alpha$ ), 6.52 (s, 1H, NH), 6.84 (m, 1H, Ar-H), 7.06 (m, 3H, Ar-H), 7.54-7.65 (m, 3H, Ar-H), 8.10 (d, 2H, Ar-H) ppm.  $^{13}\text{C}$  NMR (100 MHz,  $\text{CDCl}_3$ , 25 °C):  $\delta$  = 13.05, 18.10, 25.06, 25.90, 29.94, 32.15, 35.20, 36.52, 36.84, 36.95, 37.32, 39.05, 41.45, 46.35, 48.72, 52.22, 55.61, 58.01, 59.72, 69.10, 78.02, 78.41, 79.46, 79.62, 83.20, 87.12, 97.22, 101.32, 123.82, 126.74, 127.82, 129.62, 130.36, 130.44, 145.30, 161.64, 131.04, 134.42, 155.92, 167.72 ppm. MS (EI, 70 eV):  $m/z$  (%) = 875 [ $\text{M} + \text{H}$ ] $^+$ . EA calcd (%) for  $\text{C}_{50}\text{H}_{70}\text{N}_2\text{O}_{11}$  (874.50): calcd. C 68.62, H 8.06, N 3.20; found C 68.60, H 8.13, N 3.22.

**Compound (3c).**  $^1\text{H}$  NMR (400 MHz,  $\text{CDCl}_3$ )  $\delta$  = 1.01 (s, 3H, Me-19), 1.04 (m, 1H, H-1 $\alpha$ ), 1.15 (m, 1H, H-5 $\alpha$ ), 1.20 (m, 1H, H-6 $\alpha$ ), 1.23 (d, 6H,  $J$  = 6.4 Hz, Me-6' & Me-6''), 1.30 (m, 1H, H-4 $\beta$ ), 1.32 (s, 3H, Me-18), 1.37 (m, 1H, H-9 $\alpha$ ), 1.41 (m, 1H, H-15 $\alpha$ ), 1.52 (m, 1H, H-2 $\beta$ ), 1.60 (m, 2H, H-2'a & H-2''a), 1.65 (m, 1H, H-4 $\alpha$ ), 1.68 (m, 1H, H-6 $\beta$ ), 1.75 (m, 1H, H-1 $\beta$ ), 1.78 (m, 1H, H-11 $\alpha$ ), 1.85 (m, 1H, H-2 $\alpha$ ), 1.88 (m, 1H, H-7 $\alpha$ ), 1.90 (m, 1H, H-15 $\beta$ ), 2.04 (m, 1H, H-11 $\beta$ ), 2.05 (m, 1H, H-16 $\alpha$ ), 2.08 (m, 1H, H-7 $\beta$ ), 2.10 (m, 2H, H-2'b & H-2''b), 2.16 (m, 1H, H-16 $\beta$ ), 2.37 (s, 3H, Me), 2.79 (m, 2H, H-21), 3.10 (q, 1H, H-17 $\alpha$ ), 3.20 (dd, 2H,  $J$  = 9.5, 3.0 Hz, H-4' & H-4''), 3.45 (s, 6H, OMe), 3.68 (m, 1H, H-3 $\alpha$ ), 3.84 (m, 2H, H-5' & H-5''), 3.88 (q, 2H, H-3' & H-3''), 4.81 (dd, 1H,  $J$  = 9.5, 2.0 Hz, H-1''), 4.88 (t, 1H, H-22), 4.91 (dd, 1H,  $J$  = 9.5, 2.0 Hz, H-1'), 4.95 (dd, 1H, H-12 $\alpha$ ), 6.52 (s, 1H, NH), 7.54-7.65 (m, 3H, Ar-H), 7.80 (dd, 4H,  $J$  = 6.3 Hz, Ar-H), 8.10

(d, 2H, Ar-H) ppm. MS (EI, 70 eV):  $m/z$  (%) = 875 [M + H]<sup>+</sup>. EA calcd (%) for C<sub>50</sub>H<sub>70</sub>N<sub>2</sub>O<sub>11</sub> (874.50): calcd. C 68.62, H 8.06, N 3.20; found C 68.60, H 8.13, N 3.22.

**Compound (3d).** <sup>1</sup>H NMR (400 MHz, CDCl<sub>3</sub>) δ = 1.01 (s, 3H, Me-19), 1.04 (m, 1H, H-1α), 1.15 (m, 1H, H-5α), 1.20 (m, 1H, H-6α), 1.23 (d, 6H,  $J$  = 6.4 Hz, Me-6' & Me-6''), 1.30 (m, 1H, H-4β), 1.32 (s, 3H, Me-18), 1.37 (m, 1H, H-9α), 1.41 (m, 1H, H-15α), 1.52 (m, 1H, H-2β), 1.60 (m, 2H, H-2'a & H-2''a), 1.65 (m, 1H, H-4α), 1.68 (m, 1H, H-6β), 1.75 (m, 1H, H-1β), 1.78 (m, 1H, H-11α), 1.85 (m, 1H, H-2α), 1.88 (m, 1H, H-7α), 1.90 (m, 1H, H-15β), 2.04 (m, 1H, H-11β), 2.05 (m, 1H, H-16α), 2.08 (m, 1H, H-7β), 2.10 (m, 2H, H-2'b & H-2''b), 2.16 (m, 1H, H-16β), 2.79 (m, 2H, H-21), 3.10 (q, 1H, H-17α), 3.20 (dd, 2H,  $J$  = 9.5, 3.0 Hz, H-4' & H-4''), 3.45 (s, 6H, OMe), 3.68 (m, 1H, H-3α), 3.84 (m, 2H, H-5' & H-5''), 3.88 (q, 2H, H-3' & H-3''), 4.81 (dd, 1H,  $J$  = 9.5, 2.0 Hz, H-1''), 4.88 (t, 1H, H-22), 4.91 (dd, 1H,  $J$  = 9.5, 2.0 Hz, H-1'), 4.95 (dd, 1H, H-12α), 5.32 (s, 1H, OH), 6.52 (s, 1H, NH), 6.86 (m, 1H, Ar-H), 7.13 (m, 3H, Ar-H), 7.54-7.65 (m, 3H, Ar-H), 8.10 (d, 2H, Ar-H) ppm. MS (EI, 70 eV):  $m/z$  (%) = 877 [M + H]<sup>+</sup>. EA calcd (%) for C<sub>49</sub>H<sub>68</sub>N<sub>2</sub>O<sub>12</sub> (876.48): calcd. C 67.10, H 7.81, N 3.19; found C 67.14, H 7.80, N 3.20.

**Compound (3e).** <sup>1</sup>H NMR (400 MHz, CDCl<sub>3</sub>) δ = 1.01 (s, 3H, Me-19), 1.04 (m, 1H, H-1α), 1.15 (m, 1H, H-5α), 1.20 (m, 1H, H-6α), 1.23 (d, 6H,  $J$  = 6.4 Hz, Me-6' & Me-6''), 1.30 (m, 1H, H-4β), 1.32 (s, 3H, Me-18), 1.37 (m, 1H, H-9α), 1.41 (m, 1H, H-15α), 1.52 (m, 1H, H-2β), 1.60 (m, 2H, H-2'a & H-2''a), 1.65 (m, 1H, H-4α), 1.68 (m, 1H, H-6β), 1.75 (m, 1H, H-1β), 1.78 (m, 1H, H-11α), 1.85 (m, 1H, H-2α), 1.88 (m, 1H, H-7α), 1.90 (m, 1H, H-15β), 2.04 (m, 1H, H-11β), 2.05 (m, 1H, H-16α), 2.08 (m, 1H, H-7β), 2.10 (m, 2H, H-2'b & H-2''b), 2.16 (m, 1H, H-16β), 2.79 (m, 2H, H-21), 3.10 (q, 1H, H-17α), 3.20 (dd, 2H,  $J$  = 9.5, 3.0 Hz, H-4' & H-4''), 3.45 (s, 6H, OMe), 3.65 (s, 3H, OMe), 3.68 (m, 1H, H-3α), 3.84 (m, 2H, H-5' & H-5''), 3.88 (q, 2H, H-3' & H-3''), 4.81 (dd, 1H,  $J$  = 9.5, 2.0 Hz, H-1''), 4.88 (t, 1H, H-22), 4.91 (dd, 1H,  $J$  = 9.5, 2.0 Hz, H-1'), 4.95 (dd, 1H, H-12α), 6.52 (s, 1H, NH), 6.85-6.93 (m, 2H, Ar-H), 7.24-7.33 (m, 2H, Ar-H), 7.54-7.65 (m, 3H, Ar-H), 8.10 (d, 2H, Ar-H) ppm. MS (EI, 70 eV):  $m/z$  (%) = 891 [M + H]<sup>+</sup>. EA calcd (%) for C<sub>50</sub>H<sub>70</sub>N<sub>2</sub>O<sub>12</sub> (890.49): calcd. C 67.39, H 7.92, N 3.14; found C 67.38, H

7.90, N 3.12.

**Compound (3f).**  $^1\text{H}$  NMR (400 MHz,  $\text{CDCl}_3$ )  $\delta$  = 1.01 (s, 3H, Me-19), 1.04 (m, 1H, H-1 $\alpha$ ), 1.15 (m, 1H, H-5 $\alpha$ ), 1.20 (m, 1H, H-6 $\alpha$ ), 1.23 (d, 6H,  $J$  = 6.4 Hz, Me-6' & Me-6''), 1.30 (m, 1H, H-4 $\beta$ ), 1.32 (s, 3H, Me-18), 1.37 (m, 1H, H-9 $\alpha$ ), 1.41 (m, 1H, H-15 $\alpha$ ), 1.52 (m, 1H, H-2 $\beta$ ), 1.60 (m, 2H, H-2'a & H-2''a), 1.65 (m, 1H, H-4 $\alpha$ ), 1.68 (m, 1H, H-6 $\beta$ ), 1.75 (m, 1H, H-1 $\beta$ ), 1.78 (m, 1H, H-11 $\alpha$ ), 1.85 (m, 1H, H-2 $\alpha$ ), 1.88 (m, 1H, H-7 $\alpha$ ), 1.90 (m, 1H, H-15 $\beta$ ), 2.04 (m, 1H, H-11 $\beta$ ), 2.05 (m, 1H, H-16 $\alpha$ ), 2.08 (m, 1H, H-7 $\beta$ ), 2.10 (m, 2H, H-2'b & H-2''b), 2.16 (m, 1H, H-16 $\beta$ ), 2.79 (m, 2H, H-21), 3.10 (q, 1H, H-17 $\alpha$ ), 3.20 (dd, 2H,  $J$  = 9.5, 3.0 Hz, H-4' & H-4''), 3.45 (s, 6H, OMe), 3.63 (s, 3H, OMe), 3.68 (m, 1H, H-3 $\alpha$ ), 3.84 (m, 2H, H-5' & H-5''), 3.88 (q, 2H, H-3' & H-3''), 4.81 (dd, 1H,  $J$  = 9.5, 2.0 Hz, H-1''), 4.91 (dd, 1H,  $J$  = 9.5, 2.0 Hz, H-1'), 4.88 (t, 1H, H-22), 4.95 (dd, 1H, H-12 $\alpha$ ), 6.52 (s, 1H, NH), 6.82 (d, 2H,  $J$  = 8.1 Hz, Ar-H), 7.05 (d, 2H,  $J$  = 8.1 Hz, Ar-H), 7.54-7.65 (m, 3H, Ar-H), 8.10 (d, 2H, Ar-H) ppm. MS (EI, 70 eV):  $m/z$  (%) = 891 [M + H] $^+$ . EA calcd (%) for  $\text{C}_{50}\text{H}_{70}\text{N}_2\text{O}_{12}$  (890.49): calcd. C 67.39, H 7.92, N 3.14; found C 67.38, H 7.90, N 3.12.

**Compound (3g).**  $^1\text{H}$  NMR (400 MHz,  $\text{CDCl}_3$ )  $\delta$  = 1.01 (s, 3H, Me-19), 1.04 (m, 1H, H-1 $\alpha$ ), 1.15 (m, 1H, H-5 $\alpha$ ), 1.20 (m, 1H, H-6 $\alpha$ ), 1.23 (d, 6H,  $J$  = 6.4 Hz, Me-6' & Me-6''), 1.30 (m, 1H, H-4 $\beta$ ), 1.32 (s, 3H, Me-18), 1.37 (m, 1H, H-9 $\alpha$ ), 1.41 (m, 1H, H-15 $\alpha$ ), 1.52 (m, 1H, H-2 $\beta$ ), 1.60 (m, 2H, H-2'a & H-2''a), 1.65 (m, 1H, H-4 $\alpha$ ), 1.68 (m, 1H, H-6 $\beta$ ), 1.75 (m, 1H, H-1 $\beta$ ), 1.78 (m, 1H, H-11 $\alpha$ ), 1.85 (m, 1H, H-2 $\alpha$ ), 1.88 (m, 1H, H-7 $\alpha$ ), 1.90 (m, 1H, H-15 $\beta$ ), 2.04 (m, 1H, H-11 $\beta$ ), 2.05 (m, 1H, H-16 $\alpha$ ), 2.08 (m, 1H, H-7 $\beta$ ), 2.10 (m, 2H, H-2'b & H-2''b), 2.16 (m, 1H, H-16 $\beta$ ), 2.79 (m, 2H, H-21), 3.10 (q, 1H, H-17 $\alpha$ ), 3.20 (dd, 2H,  $J$  = 9.5, 3.0 Hz, H-4' & H-4''), 3.45 (s, 6H, OMe), 3.68 (m, 1H, H-3 $\alpha$ ), 3.74 (s, 6H, OMe), 3.84 (m, 2H, H-5' & H-5''), 3.88 (q, 2H, H-3' & H-3''), 4.81 (dd, 1H,  $J$  = 9.5, 2.0 Hz, H-1''), 4.88 (t, 1H, H-22), 4.91 (dd, 1H,  $J$  = 9.5, 2.0 Hz, H-1'), 4.95 (dd, 1H, H-12 $\alpha$ ), 6.52 (s, 1H, NH), 6.64-6.78 (m, 3H, Ar-H), 7.54-7.65 (m, 3H, Ar-H), 8.10 (d, 2H, Ar-H) ppm. MS (EI, 70 eV):  $m/z$  (%) = 921 [M + H] $^+$ . EA calcd (%) for  $\text{C}_{51}\text{H}_{72}\text{N}_2\text{O}_{13}$  (920.49): calcd. C 66.50, H 7.88, N 3.04; found C 66.48, H 7.86, N 2.99.

**Compound (3h).** <sup>1</sup>H NMR (400 MHz, CDCl<sub>3</sub>) δ = 1.01 (s, 3H, Me-19), 1.04 (m, 1H, H-1α), 1.15 (m, 1H, H-5α), 1.20 (m, 1H, H-6α), 1.23 (d, 6H, *J* = 6.4 Hz, Me-6' & Me-6''), 1.30 (m, 1H, H-4β), 1.32 (s, 3H, Me-18), 1.37 (m, 1H, H-9α), 1.41 (m, 1H, H-15α), 1.52 (m, 1H, H-2β), 1.60 (m, 2H, H-2'a & H-2''a), 1.65 (m, 1H, H-4α), 1.68 (m, 1H, H-6β), 1.75 (m, 1H, H-1β), 1.78 (m, 1H, H-11α), 1.85 (m, 1H, H-2α), 1.88 (m, 1H, H-7α), 1.90 (m, 1H, H-15β), 2.04 (m, 1H, H-11β), 2.05 (m, 1H, H-16α), 2.08 (m, 1H, H-7β), 2.10 (m, 2H, H-2'b & H-2''b), 2.16 (m, 1H, H-16β), 2.79 (m, 2H, H-21), 3.10 (q, 1H, H-17α), 3.20 (dd, 2H, *J* = 9.5, 3.0 Hz, H-4' & H-4''), 3.45 (s, 6H, OMe), 3.68 (m, 1H, H-3α), 3.84 (m, 2H, H-5' & H-5''), 3.88 (q, 2H, H-3' & H-3''), 4.81 (dd, 1H, *J* = 9.5, 2.0 Hz, H-1''), 4.88 (t, 1H, H-22), 4.91 (dd, 1H, *J* = 9.5, 2.0 Hz, H-1'), 4.95 (dd, 1H, H-12α), 6.52 (s, 1H, NH), 6.80-6.91 (m, 2H, Ar-H), 7.30-7.34 (m, 2H, Ar-H), 7.54-7.65 (m, 3H, Ar-H), 8.10 (d, 2H, Ar-H) ppm. MS (EI, 70 eV): *m/z* (%) = 879 [M + H]<sup>+</sup>. EA calcd (%) for C<sub>49</sub>H<sub>67</sub>FN<sub>2</sub>O<sub>11</sub> (879.47): calcd. C 66.95, H 7.68, N 3.19; found C 66.91, H 7.70, N 3.20.

**Compound (3i).** <sup>1</sup>H NMR (400 MHz, CDCl<sub>3</sub>) δ = 1.01 (s, 3H, Me-19), 1.04 (m, 1H, H-1α), 1.15 (m, 1H, H-5α), 1.20 (m, 1H, H-6α), 1.23 (d, 6H, *J* = 6.4 Hz, Me-6' & Me-6''), 1.30 (m, 1H, H-4β), 1.32 (s, 3H, Me-18), 1.37 (m, 1H, H-9α), 1.41 (m, 1H, H-15α), 1.52 (m, 1H, H-2β), 1.60 (m, 2H, H-2'a & H-2''a), 1.65 (m, 1H, H-4α), 1.68 (m, 1H, H-6β), 1.75 (m, 1H, H-1β), 1.78 (m, 1H, H-11α), 1.85 (m, 1H, H-2α), 1.88 (m, 1H, H-7α), 1.90 (m, 1H, H-15β), 2.04 (m, 1H, H-11β), 2.05 (m, 1H, H-16α), 2.08 (m, 1H, H-7β), 2.10 (m, 2H, H-2'b & H-2''b), 2.16 (m, 1H, H-16β), 2.79 (m, 2H, H-21), 3.10 (q, 1H, H-17α), 3.20 (dd, 2H, *J* = 9.5, 3.0 Hz, H-4' & H-4''), 3.45 (s, 6H, OMe), 3.68 (m, 1H, H-3α), 3.84 (m, 2H, H-5' & H-5''), 3.88 (q, 2H, H-3' & H-3''), 4.81 (dd, 1H, *J* = 9.5, 2.0 Hz, H-1''), 4.88 (t, 1H, H-22), 4.91 (dd, 1H, *J* = 9.5, 2.0 Hz, H-1'), 4.95 (dd, 1H, H-12α), 6.52 (s, 1H, NH), 7.09 (d, 2H, *J* = 8.4), 7.37 (d, 2H, *J* = 8.4), 7.54-7.65 (m, 3H, Ar-H), 8.10 (d, 2H, Ar-H) ppm. MS (EI, 70 eV): *m/z* (%) = 895 [M + H]<sup>+</sup>. EA calcd (%) for C<sub>49</sub>H<sub>67</sub>ClN<sub>2</sub>O<sub>11</sub> (894.44): calcd. C 65.72, H 7.54, N 3.13; found C 65.70, H 7.53, N 3.12.

**Compound (3j).** <sup>1</sup>H NMR (400 MHz, CDCl<sub>3</sub>) δ = 1.01 (s, 3H, Me-19), 1.04 (m, 1H, H-1α), 1.15 (m, 1H, H-5α), 1.20 (m, 1H, H-6α), 1.23 (d, 6H, *J* = 6.4 Hz, Me-6' & Me-6''), 1.30 (m, 1H, H-4β), 1.32 (s, 3H, Me-18), 1.37 (m, 1H, H-9α), 1.41 (m, 1H, H-15α), 1.52

(m, 1H, H-2 $\beta$ ), 1.60 (m, 2H, H-2`a & H-2``a), 1.65 (m, 1H, H-4 $\alpha$ ), 1.68 (m, 1H, H-6 $\beta$ ), 1.75 (m, 1H, H-1 $\beta$ ), 1.78 (m, 1H, H-11 $\alpha$ ), 1.85 (m, 1H, H-2 $\alpha$ ), 1.88 (m, 1H, H-7 $\alpha$ ), 1.90 (m, 1H, H-15 $\beta$ ), 2.04 (m, 1H, H-11 $\beta$ ), 2.05 (m, 1H, H-16 $\alpha$ ), 2.08 (m, 1H, H-7 $\beta$ ), 2.10 (m, 2H, H-2`b & H-2``b), 2.16 (m, 1H, H-16 $\beta$ ), 2.79 (m, 2H, H-21), 3.10 (q, 1H, H-17 $\alpha$ ), 3.20 (dd, 2H,  $J = 9.5, 3.0$  Hz, H-4` & H-4``), 3.45 (s, 6H, OMe), 3.68 (m, 1H, H-3 $\alpha$ ), 3.84 (m, 2H, H-5` & H-5``), 3.88 (q, 2H, H-3` & H-3``), 4.81 (dd, 1H,  $J = 9.5, 2.0$  Hz, H-1``), 4.88 (t, 1H, H-22), 4.91 (dd, 1H,  $J = 9.5, 2.0$  Hz, H-1`), 4.95 (dd, 1H, H-12 $\alpha$ ), 6.52 (s, 1H, NH), 6.28 (m, 2H, Ar-H), 7.30 (s, 1H, Ar-H), 7.54-7.65 (m, 3H, Ar-H), 8.10 (d, 2H, Ar-H) ppm. MS (EI, 70 eV):  $m/z$  (%) = 851 [M + H]<sup>+</sup>. EA calcd (%) for C<sub>47</sub>H<sub>66</sub>N<sub>2</sub>O<sub>12</sub> (850.46): calcd. C 66.33, H 7.82, N 3.29; found C 66.32, H 7.80, N 3.31.

**Compound (3k).** <sup>1</sup>H NMR (400 MHz, CDCl<sub>3</sub>)  $\delta =$  1.01 (s, 3H, Me-19), 1.04 (m, 1H, H-1 $\alpha$ ), 1.15 (m, 1H, H-5 $\alpha$ ), 1.20 (m, 1H, H-6 $\alpha$ ), 1.23 (d, 6H,  $J = 6.4$  Hz, Me-6` & Me-6``), 1.30 (m, 1H, H-4 $\beta$ ), 1.32 (s, 3H, Me-18), 1.37 (m, 1H, H-9 $\alpha$ ), 1.41 (m, 1H, H-15 $\alpha$ ), 1.52 (m, 1H, H-2 $\beta$ ), 1.60 (m, 2H, H-2`a & H-2``a), 1.65 (m, 1H, H-4 $\alpha$ ), 1.68 (m, 1H, H-6 $\beta$ ), 1.75 (m, 1H, H-1 $\beta$ ), 1.78 (m, 1H, H-11 $\alpha$ ), 1.85 (m, 1H, H-2 $\alpha$ ), 1.88 (m, 1H, H-7 $\alpha$ ), 1.90 (m, 1H, H-15 $\beta$ ), 2.04 (m, 1H, H-11 $\beta$ ), 2.05 (m, 1H, H-16 $\alpha$ ), 2.08 (m, 1H, H-7 $\beta$ ), 2.10 (m, 2H, H-2`b & H-2``b), 2.16 (m, 1H, H-16 $\beta$ ), 2.79 (m, 2H, H-21), 3.10 (q, 1H, H-17 $\alpha$ ), 3.20 (dd, 2H,  $J = 9.5, 3.0$  Hz, H-4` & H-4``), 3.45 (s, 6H, OMe), 3.68 (m, 1H, H-3 $\alpha$ ), 3.84 (m, 2H, H-5` & H-5``), 3.88 (q, 2H, H-3` & H-3``), 4.81 (dd, 1H,  $J = 9.5, 2.0$  Hz, H-1``), 4.88 (t, 1H, H-22), 4.91 (dd, 1H,  $J = 9.5, 2.0$  Hz, H-1`), 4.95 (dd, 1H, H-12 $\alpha$ ), 6.52 (s, 1H, NH), 6.82 (d, 2H,  $J = 7.2$  Hz, Ar-H), 7.54-7.65 (m, 3H, Ar-H), 7.86 (d, 2H,  $J = 7.2$  Hz, Ar-H), 8.10 (d, 2H, Ar-H) ppm. MS (EI, 70 eV):  $m/z$  (%) = 906 [M + H]<sup>+</sup>. EA calcd (%) for C<sub>49</sub>H<sub>67</sub>N<sub>3</sub>O<sub>13</sub> (905.47): calcd. C 64.95, H 7.45, N 4.64; found C 64.98, H 7.42, N 4.63.
